# Supplementary material for: Whole Genome Sequence of biosurfactant producing Bacillus tequilensis
Source: Research Square preprint supplement (doi:10.21203/rs.3.rs-115961/v1), 2020-12-10
Supplement: Supplementary file 3 [file 356bbe2dc2b527e8cf1c795c.docx]

**Whole Genome Sequence of biosurfactant producing *Bacillus tequilensis***

Anuraj Nayarisseri1,2,3,*, Sanjeev Kumar Singh1*

***Corresponding authors Email:** anuraj@eminentbio.com; skysanjeev@gmail.com

1. Computer Aided Drug Designing and Molecular Modeling Lab, Department of Bioinformatics, Alagappa University, Karaikudi-630 003, Tamil Nadu, India.
2. In silico Research Laboratory, Eminent Biosciences, Indore – 452 010, Madhya Pradesh, India.
3. Bioinformatics Research Laboratory, LeGene Biosciences Pvt Ltd., Mahalakshmi Nagar, Indore - 452010, Madhya Pradesh, India.

**Title for the supplementary files**

Supplementary Table 1 :*Bacillus tequilensis* Genome annotation data

URL: <https://bit.ly/3lxwzDd>

Supplementary table 2 : *Bacillus tequilensis* CDS data

URL: <https://bit.ly/2VuIXt9>

Supplementary table 3 : *Bacillus tequilensis* subsystem classification

URL: <https://bit.ly/2VsgRif>

Supplementary table 4 : Variant calling of *Bacillus tequilensis* ANSKLAB04 by comparing *Bacillus tequilensis* KCTC 13622

URL: <https://bit.ly/3ga5F3m>

Supplementary table 5 : Variant calling of *Bacillus tequilensis* ANSKLAB04 by comparing *Bacillus subtilis*

*URL:* [*https://bit.ly/33yI3Aj*](https://bit.ly/33yI3Aj)

Supplementary table 6 : Variant calling of *Bacillus tequilensis* ANSKLAB04 by comparing *Bacillus vallismortis*

*URL:* [*https://bit.ly/33FRxcX*](https://bit.ly/33FRxcX)

Supplementary table 7 : Variant calling of *Bacillus tequilensis* ANSKLAB04 by comparing *Bacillus halotolerans*

*URL:* [*https://bit.ly/2VuJSK7*](https://bit.ly/2VuJSK7)

Supplementary table 8 : Variant calling of *Bacillus tequilensis* ANSKLAB04 by comparing *Bacillus mojavensis*

URL: <https://bit.ly/2VrZRsk>
